# Supplementary material for: Ipconazole Disrupts Mitochondrial Homeostasis and Alters GABAergic Neuronal Development in Zebrafish
Source: MDPI journal article supplement (doi:10.3390/ijms24010496), 2022-12-28
Supplement: s1 [file s1]

# Ipconazole Disrupts Mitochondrial Homeostasis and Alters GABAergic Neuronal Development in Zebrafish

Giyoung Lee <sup>1,†</sup>, Amit Banik <sup>2,†</sup>, Juneyong Eum <sup>2</sup>, Byung Joon Hwang <sup>3</sup>, Seung-Hae Kwon <sup>4,\*</sup> and Yun Kee <sup>5,\*</sup>

<sup>1</sup> Department of Biomedical Science, College of Biomedical Science, Kangwon National University, Chuncheon 24341, Republic of Korea

<sup>2</sup> Interdisciplinary Graduate Program in Environmental and Biomedical Convergence, Kangwon National University, Chuncheon 24341, Republic of Korea

<sup>3</sup> Department of Molecular Bioscience, College of Biomedical Science, Kangwon National University, Chuncheon 24341, Republic of Korea

<sup>4</sup> Korea Basic Science Institute Seoul Center, Seoul 02841, Republic of Korea

<sup>5</sup> Division of Biomedical Convergence, College of Biomedical Science, Kangwon National University, Chuncheon 24341, Republic of Korea

\* Correspondence: kwonsh@kbsi.re.kr (S.-H.K.); yunkee@kangwon.ac.kr (Y.K.)

† These authors contributed equally to this work.

**Table S1. RT-PCR primers**

| Types                                  | Official Gene name | Forward primer            | Reverse primer             | Zebrafish mRNA ID |
|----------------------------------------|--------------------|---------------------------|----------------------------|-------------------|
| Control                                | $\beta$ -actin     | GTGATGGTTGGCATG<br>GGACAG | CCAGTTGGTCACAA<br>TACCGTGC | NM_131031.2       |
| Mitochondria genome maintenance        | tk2                | CCTGTATGAGGACTG<br>GCTGA  | TCTGTTCTCCTCAAA<br>CTGATGC | XM_017356845.2    |
|                                        | polg               | GGTGACCAGTGAAGA<br>CCGATA | GTCCACTGCGCTAA<br>AGAAGG   | XM_001921095.6    |
|                                        | twnk               | TGTGGGCTGACAAGTT<br>TGAGG | TGTCCACAGACAGA<br>TTTCTTG  | NM_001277598.2    |
|                                        | polrmt             | ACCCGCTGCCGCCTTA<br>TTTT  | TCCAGCGAGCTCTG<br>CTTCTTC  | XM_005170522.3    |
|                                        | tfam               | GCGAAAGATTGCCCA<br>GCAGT  | TTGTCGTTTTTCCTCC<br>GCAA   | NM_001077389.1    |
| Mitochondria fusion & fission          | mfn2               | GGCAGGACCAGTAAC<br>GGAAA  | TTTCGTCCGACCCTT<br>CAGTG   | XM_005172484.4    |
|                                        | dnm1l              | CGCAGAGTAGCGGGA<br>AGAG   | CATCCACTCCGTTCT<br>CCTCG   | XM_005163049.2    |
| Mitochondria respiratory complexes I-V | ndufs4             | TGTAGGCTGGCAGAG<br>GGACA  | GACAGGCCGAAACA<br>GGATGG   | NM_001020676.1    |
|                                        | sdha               | TGGTATGCCGTTTCAGC<br>CGTA | GGCCAAGTCTTTGG<br>CATTGG   | NM_200910.1       |
|                                        | uqcrc2b            | GACCTCACGGGAAGG<br>GTGAA  | TCAGTGTGCTGGTGC<br>TGCTG   | NM_001001589.1    |

|                                            |                 |                             |                             |                |
|--------------------------------------------|-----------------|-----------------------------|-----------------------------|----------------|
|                                            | <b>cox5ab</b>   | GGTCACCGGAGCTTC<br>AGGAT    | TCGAGCCGAGAGGT<br>AGAAAAACC | NM_001305577.1 |
|                                            | <b>atp5fa1</b>  | TTCTTGAGCCGACAC<br>TGGA     | CGAACACCACAACA<br>CCAACG    | NM_001077355.1 |
| <b>Oxidative stress</b>                    | <b>gpx1a</b>    | AGATGTCATTCTGCA<br>CACG     | AAGGAGAAGCTTCC<br>TCAGCC    | NM_001007281.2 |
|                                            | <b>sod1</b>     | GGGCAACCGATAGT<br>GTGAG     | ACCCTTCCCCAAGTC<br>ATCCT    | NM_131294.1    |
|                                            | <b>sod2</b>     | CCGGACTATGTAAA<br>GCCATCT   | ACACTCGGTTGCTCT<br>CTTTCTCT | NM_199976.1    |
|                                            | <b>nrf2a</b>    | ATGTCTAAATGCAG<br>CCAAGCC   | CGGTAGCTGAAGTC<br>GAACAC    | XM_005172511.4 |
| <b>Apoptotic marker</b>                    | <b>bcl2a</b>    | AGGAAAATGGAGGTT<br>GGGATG   | TGTTAGGTATGAAA<br>ACGGGTGGA | NM_001030253.2 |
|                                            | <b>baxa</b>     | GGCTATTTCAACCAG<br>GGTTCC   | TGCGAATCACCAAT<br>GCTGT     | NM_131562.2    |
|                                            | <b>casp9</b>    | AAATACAGAGCAAGG<br>CAACC    | CACAGGGAATCAAG<br>AAAGG     | NM_001007404.2 |
|                                            | <b>apaf1</b>    | TTCTACAGTAAACGC<br>CCACC    | TATCTAGTATTTCCC<br>CATATTCC | XM_021475139.1 |
|                                            | <b>casp3a</b>   | CCGCTGCCCATCACTA            | ATCCTTTCACGACCA<br>TCT      | NM_131877.3    |
|                                            | <b>casp8</b>    | GGAATGATCTGGAAG<br>CCTGGG   | TCCGGCAAAAGGCA<br>GTGTAA    | NM_131510.2    |
| <b>Necroptotic marker</b>                  | <b>ripk1</b>    | TCCTGGACCAAACCA<br>TCAGC    | ACTGACTCCTCAATT<br>CGGGC    | NM_001043350.1 |
|                                            | <b>ripk3</b>    | AGCAAAGCCTTCGAC<br>GTGTA    | CATCCAGTCCTTCGG<br>TCTCG    | XM_001343791.5 |
| <b>Heat shock protein marker</b>           | <b>hsp70</b>    | GCACAAGAAGGACAT<br>CAGTCAGA | CGATGCCCTCGTAC<br>AGAGAGT   | NM_001362359.1 |
| <b>Neurotransmitter marker</b>             | <b>slc17a6b</b> | GAAGTGACCGAGGAT<br>GGACG    | TTGCTTTTATGGCCA<br>CGCCT    | NM_001005398.1 |
|                                            | <b>gad1b</b>    | G TTCAGCCATCCTGGT<br>CAGA   | CCTTGTCTCCGGTGT<br>CGTAG    | XM_009302104.3 |
|                                            | <b>th</b>       | GACGGAAGATGATCG<br>GAGACA   | CCGCCATGTTCCGAT<br>TTCT     | NM_131149.1    |
| <b>oligodendrocytes/<br/>myelin marker</b> | <b>olig1</b>    | CGGACTGAAAGTTTG<br>AAGAATGC | TCCTGTTACCCGTAC<br>CATTCTTG | XM_005167653.4 |
|                                            | <b>olig2</b>    | ATCCGTCCAGTTGTGG<br>CACT    | TGGTGGAAGCAGAG<br>GATGGT    | NM_178100.1    |
|                                            | <b>mbp</b>      | CCGTCGTGGAGACGT<br>CAA      | CGAGGAGAGGACAC<br>AAAGCT    | XM_021468312.1 |
